# Supplementary material for: In Vitro Evaluation of Antimicrobial Peptides from the Black Soldier Fly (Hermetia Illucens) against a Selection of Human Pathogens
Source: PubMed Central journal article supplement (PMC8729770; doi:10.1128/spectrum.01664-21), 2022-01-05
Supplement: spectrum01664-21_supp_1_seq9.pdf [file spectrum01664-21_supp_1_seq9.pdf]

**Table S1** Overview of the black soldier fly antimicrobial peptide library.

| Peptide                          | Sequence                                                              | Purity (%) | Modification                   | pI    | Molar Mass (g/mol) |
|----------------------------------|-----------------------------------------------------------------------|------------|--------------------------------|-------|--------------------|
| Alo1-like                        |                                                                       |            |                                |       |                    |
| Hill-Alo1                        | CINNGDGCQPDGRQGNCCSGYCHKEPGWVTGYCR                                    | 90.94      | -                              | 6.67  | 3679.04            |
| Hill-Alo2                        | CIANGNGCQPDGRQGNCCSGFCYKQRGWVAGYCRRR                                  | 95.69      | -                              | 8.77  | 3985.5             |
| Diptericin fragment              |                                                                       |            |                                |       |                    |
| Hill-Dip1                        | ASVPEPADLREAFETEDAIYIPISEEEANRLRLPR                                   | 92.77      | -                              | 4.04  | 3982.41            |
| Hill-Dip2                        | SAPKLEEEESALSYIPDAAEAEIAPASSHGRVRR                                    | 96.53      | -                              | 3.37  | 3637.92            |
| Hill-Dip3                        | DVEQVLETEDAYYVPVSDDEAEVLRRLPR                                         | 93.08      | -                              | 3.37  | 3264.5             |
| Hill-Dip4                        | SIDDLTLEDGEDHVEIITDDEVQRAKR                                           | 93.25      | -                              | 3.7   | 3199.35            |
| Diptericin                       |                                                                       |            |                                |       |                    |
| Hill-Dip5                        | QLNIQGGGSPHSGFDLSVQGRAKIWESDNGRNTLYGTGQYGQH<br>LGGPYGNSEPSFGGGLMFSHRF | Crude      | -                              | 7.72  | 6928.42            |
| Hill-Dip6                        | QIFAQGGGSPGKGYDIYAQGRAKLWESQNQRNSLHGTASYSQH<br>LGGPYGNSRPNVGGGLTFTHRF | 90.00      | -                              | 10.28 | 6981.51            |
| Knottin-like                     |                                                                       |            |                                |       |                    |
| Hill-Knot1                       | IKCTASICTQICRILKYKCGYCASASRCVCLK                                      | 91.56      | -                              | 8.79  | 3531.37            |
| Hill-Knot2                       | IKCVPSQCNQICRVLGKKCGYCKNASTCVCL                                       | 96.43      | C-terminal amidation           | 8.81  | 3363.14            |
| Hill-Knot3                       | RKCTASQCTRVCKKLGKRGYCSSTKCVC                                          | 90.22      | -                              | 9.8   | 3390.06            |
| Defensin without SS <sup>b</sup> |                                                                       |            |                                |       |                    |
| Hill-Def1                        | VTCDLLEPFLGPAPCMIHCIVRFRKRTGYCNSQNVCVCR                               | 94.26      | C-terminal amidation           | 8.41  | 4443.34            |
| Hill-Def2a                       | ATCDLLSPFKVGHAAACAAHCIARGKRGGWCDKRAVCNCRK                             | 93.75      | -                              | 9.26  | 4275.04            |
| Hill-Def3                        | ATCTNWNCRQTQCIARGKRGGYCVERNICKCTS                                     | 93.97      | -                              | 8.76  | 3597.16            |
| Hill-Def4                        | ATCDLLSPFKVGHAAACALHCIALGRRGGWCDGRAVCNCRR                             | 92.58      | -                              | 8.43  | 4259               |
| Hill-Def5                        | AMCDLLSGLNMGRSVCAMRCILKGRGGWCDQGVNCRV                                 | 91.95      | -                              | 7.84  | 4330.15            |
| Hill-Def6                        | LSCLFENQAVSAIACGASCITRKGKRGGWCSNGVCRCTPN                              | 90.56      | -                              | 8.42  | 4162.82            |
| Hill-Def7                        | TTCDLISGTKIENIACAAHCIAMGHKGGYCNSNLICICR                               | 93.94      | -                              | 7.46  | 4099.82            |
| Hill-Def8                        | QLPCDYLSGLFGEDACNTDCIAKGHKSGFCTGLVCRCTRL                              | 92.20      | -                              | 6.66  | 4353.99            |
| Defensin with SS <sup>b</sup>    |                                                                       |            |                                |       |                    |
| Hill-Def2b                       | ATCDLLSPFKVGHAAACAAHCIARGKRGGWCDKRAVCNCRK                             | 99.10      | SS-Bridges: 3-36; 16-30; 20-38 | 9.26  | 4275.04            |
| Linear peptide                   |                                                                       |            |                                |       |                    |

|               |                                                                  |       |                      |       |         |
|---------------|------------------------------------------------------------------|-------|----------------------|-------|---------|
| Hill-Lin1     | AIYHRSIRSPQFSGSSASANAQSSSGRGGFFGGSSSSSSANAET<br>NSFGG            | 92.77 | C-terminal amidation | 10.92 | 4712.8  |
| Hill-Lin2     | AIYHRSIRSPQFSGSSASANAQSSSGRGGFFGGSSSSSSANAET<br>NSFGG            | Crude | C-terminal amidation | 11.82 | 4712.8  |
| Cecropin      |                                                                  |       |                      |       |         |
| Hill-Cec1     | SWWKKVFKPVEKLGQRVRDATIQGIGIAQQGANVLATVRGGPPQ                     | 96.40 | C-terminal amidation | 11.93 | 4785.52 |
| Hill-Cec2     | GWWKRVFKPVEKFGQRVRDAGVQGIAIAQQGANVLATARGGPP<br>QQ                | 90.49 | C-terminal amidation | 12.14 | 4873.54 |
| Hill-Cec3     | GWWKRVFKPVEKLGQRVRDAGIQGLEIAQQGANVLATARGGPP<br>QQ                | 90.85 | C-terminal amidation | 11.75 | 4911.59 |
| Hill-Cec4     | GWWKRVFKPVERLGQRVRDAGIQGLQIAQQGANVLATVRGGPP<br>QQ                | 90.12 | C-terminal amidation | 12.29 | 4966.67 |
| Hill-Cec5     | SWFKKVFKPVEKVGQRVRDAGIQGVAIAQQGANVLATARGGPPH                     | 91.89 | C-terminal amidation | 11.93 | 4669.36 |
| Hill-Cec6     | DQSKEPFKPMERPYQRVRDAKIQQGITAQNGPNVLAITRGGLEQ                     | 90.87 | C-terminal amidation | 10.54 | 4950.6  |
| Hill-Cec7     | GWWKKVFKPVEKLGQRVRDAGIQGIAIAQQGANVLATVRGGPPQ                     | 92.21 | C-terminal amidation | 11.93 | 4725.46 |
| Hill-Cec8     | GWWKRVFKPVEKFGQRVRDAGIQGIEIAQQGANVLATARGGPP<br>QQ                | 94.74 | C-terminal amidation | 11.75 | 4945.6  |
| Hill-Cec9     | GWWKRVFKPVEKLGQRVRDAGIQGLEIAQQGANVLATVRGGPP<br>QQ                | 91.69 | C-terminal amidation | 11.75 | 4939.64 |
| Hill-Cec10    | RWYKKIFKPVEKAVQRVRDGTLQALGVAQQAANVYATAQGAQQ<br>QRHA              | 92.13 | C-terminal amidation | 11.42 | 5279.98 |
| Hill-Cec11    | RSLWKKIFKPVEKLGQRVRDAGIQGIAIAQQGANVLATVRGGPPQ                    | 94.37 | C-terminal amidation | 12.16 | 4852.65 |
| Hill-Cec12    | RSLWKKLFPVERAGQRIRDATIKGIVIAQQGANVLATIRGGPAIPP<br>GQ             | 91.34 | C-terminal amidation | 12.31 | 5277.19 |
| Hill-Cec13    | KSWWKKVFKPVERAGQRIRDASIKGLAVAQQGANVLSTIRGGPP<br>VVAPPPQV         | 91.28 | C-terminal amidation | 12.17 | 5589.51 |
| Stomoxyn-like |                                                                  |       |                      |       |         |
| Hill-Stom1    | FNNLPICVEGLAGDIGSILLGVEDIGALAGAIANLALIAGECAAQG<br>EAGAAICA       | Crude | C-terminal amidation | 3.27  | 5181.92 |
| Hill-Stom2    | TKAGPIVGNVLSIVGDAVAAGIAIARAPAIVADVEYCATNVVATTV<br>ATLSKFGAAVKKCA | 55.10 | C-terminal amidation | 9.4   | 5911.94 |

<sup>a</sup> The molecular weight (MW) and isoelectric point (pI) of the peptides were calculated using the online software at <http://pepcalc.com/>

<sup>b</sup> SS = disulfide bridges

**Table S2** IC50 values (concentrations causing 50% growth inhibition of the pathogen), MIC values (minimum inhibitory concentrations needed for visual absence of bacterial growth), and MBC values (minimum concentrations needed for bactericidal activity) obtained in two individual screenings: the first screening starting at 64µM, the second screening starting at 32 µM. Static = bacteriostatic activity.

| AMP        | Repeat | IC50 (µM)    |                            |                          |                                |                           |                            | MIC (µM)                   |                          |                                | MBC (µM)                   |                          |                                |
|------------|--------|--------------|----------------------------|--------------------------|--------------------------------|---------------------------|----------------------------|----------------------------|--------------------------|--------------------------------|----------------------------|--------------------------|--------------------------------|
|            |        | MRC-5 SV2    | <i>S. aureus</i> ATCC 6538 | <i>E. coli</i> ATCC 8739 | <i>P. aeruginosa</i> ATCC 9027 | <i>C. albicans</i> B59630 | <i>A. fumigatus</i> B42928 | <i>S. aureus</i> ATCC 6538 | <i>E. coli</i> ATCC 8739 | <i>P. aeruginosa</i> ATCC 9027 | <i>S. aureus</i> ATCC 6538 | <i>E. coli</i> ATCC 8739 | <i>P. aeruginosa</i> ATCC 9027 |
| Hill-Alo1  | 1      | > 64.00      | > 64.00                    | > 64.00                  | > 64.00                        | > 64.00                   | > 64.00                    | > 64.00                    | > 64.00                  | > 64.00                        | -                          | -                        | -                              |
|            | 2      | > 32.00      | > 32.00                    | > 32.00                  | > 32.00                        | > 32.00                   | > 32.00                    | > 32.00                    | > 32.00                  | > 32.00                        | -                          | -                        | -                              |
| Hill-Alo2  | 1      | > 64.00      | > 64.00                    | > 64.00                  | > 64.00                        | > 64.00                   | > 64.00                    | > 64.00                    | > 64.00                  | > 64.00                        | -                          | -                        | -                              |
|            | 2      | > 32.00      | > 32.00                    | > 32.00                  | > 32.00                        | > 32.00                   | > 32.00                    | > 32.00                    | > 32.00                  | > 32.00                        | -                          | -                        | -                              |
| Hill-Dip1  | 1      | <b>32.00</b> | > 64.00                    | > 64.00                  | > 64.00                        | > 64.00                   | > 64.00                    | > 64.00                    | > 64.00                  | > 64.00                        | -                          | -                        | -                              |
|            | 2      | > 32.00      | > 32.00                    | > 32.00                  | > 32.00                        | > 32.00                   | > 32.00                    | > 32.00                    | > 32.00                  | > 32.00                        | -                          | -                        | -                              |
| Hill-Dip2  | 1      | > 64.00      | > 64.00                    | > 64.00                  | > 64.00                        | > 64.00                   | > 64.00                    | > 64.00                    | > 64.00                  | > 64.00                        | -                          | -                        | -                              |
|            | 2      | > 32.00      | > 32.00                    | > 32.00                  | > 32.00                        | > 32.00                   | > 32.00                    | > 32.00                    | > 32.00                  | > 32.00                        | -                          | -                        | -                              |
| Hill-Dip3  | 1      | > 64.00      | > 64.00                    | > 64.00                  | > 64.00                        | > 64.00                   | > 64.00                    | > 64.00                    | > 64.00                  | > 64.00                        | -                          | -                        | -                              |
|            | 2      | > 32.00      | > 32.00                    | > 32.00                  | > 32.00                        | > 32.00                   | > 32.00                    | > 32.00                    | > 32.00                  | > 32.00                        | -                          | -                        | -                              |
| Hill-Dip4  | 1      | > 64.00      | > 64.00                    | > 64.00                  | > 64.00                        | > 64.00                   | > 64.00                    | > 64.00                    | > 64.00                  | > 64.00                        | -                          | -                        | -                              |
|            | 2      | > 32.00      | > 32.00                    | > 32.00                  | > 32.00                        | > 32.00                   | > 32.00                    | > 32.00                    | > 32.00                  | > 32.00                        | -                          | -                        | -                              |
| Hill-Dip5  | 1      | > 64.00      | > 64.00                    | > 64.00                  | > 64.00                        | > 64.00                   | > 64.00                    | > 64.00                    | > 32.00                  | > 32.00                        | -                          | -                        | -                              |
|            | 2      | > 32.00      | > 32.00                    | > 32.00                  | > 32.00                        | > 32.00                   | > 32.00                    | > 32.00                    | > 64.00                  | > 64.00                        | -                          | -                        | -                              |
| Hill-Dip6  | 1      | <b>4.54</b>  | > 32.00                    | <b>0.85</b>              | > 32.00                        | > 64.00                   | > 64.00                    | > 32.00                    | <b>2.00</b>              | > 3200                         | -                          | static                   | -                              |
|            | 2      | <b>7.73</b>  | > 32.00                    | <b>1.00</b>              | > 32.00                        | > 32.00                   | > 32.00                    | > 64.00                    | <b>2.00</b>              | > 64.00                        | -                          | 8,00                     | -                              |
| Hill-Knot1 | 1      | > 64.00      | > 64.00                    | > 64.00                  | > 64.00                        | > 64.00                   | > 64.00                    | > 64.00                    | > 64.00                  | > 64.00                        | -                          | -                        | -                              |
|            | 2      | > 32.00      | > 32.00                    | > 32.00                  | > 32.00                        | > 32.00                   | > 32.00                    | > 32.00                    | > 32.00                  | > 32.00                        | -                          | -                        | -                              |
| Hill-Knot2 | 1      | <b>9.73</b>  | > 64.00                    | > 64.00                  | > 64.00                        | > 64.00                   | > 64.00                    | > 64.00                    | > 64.00                  | > 64.00                        | -                          | -                        | -                              |
|            | 2      | <b>3.76</b>  | > 32.00                    | > 32.00                  | > 32.00                        | > 32.00                   | > 32.00                    | > 32.00                    | > 32.00                  | > 32.00                        | -                          | -                        | -                              |
| Hill-Knot3 | 1      | > 64.00      | > 64.00                    | > 64.00                  | <b>22.63</b>                   | > 64.00                   | > 64.00                    | > 64.00                    | > 64.00                  | > 64.00                        | -                          | -                        | -                              |
|            | 2      | > 32.00      | > 32.00                    | > 32.00                  | > 32.00                        | > 32.00                   | > 32.00                    | > 32.00                    | > 32.00                  | > 32.00                        | -                          | -                        | -                              |

|            |   |   |       |              |             |              |              |             |             |       |       |             |              |             |              |             |             |        |        |       |       |   |       |   |   |   |
|------------|---|---|-------|--------------|-------------|--------------|--------------|-------------|-------------|-------|-------|-------------|--------------|-------------|--------------|-------------|-------------|--------|--------|-------|-------|---|-------|---|---|---|
| Hill-Def1  | 1 | > | 64.00 | >            | 64.00       | >            | 64.00        | >           | 64.00       | >     | 64.00 | >           | 64.00        | >           | 64.00        | >           | 64.00       | >      | 64.00  | >     | 64.00 | > | 64.00 | - | - | - |
|            | 2 | > | 32.00 | >            | 32.00       | >            | 32.00        | >           | 32.00       | >     | 32.00 | >           | 32.00        | >           | 32.00        | >           | 32.00       | >      | 32.00  | >     | 32.00 | > | 32.00 | - | - | - |
| Hill-Def2a | 1 | > | 64.00 | <            | <b>0.25</b> | <b>35.33</b> | <b>32.86</b> | >           | 64.00       | >     | 64.00 | <b>0.25</b> | >            | 64.00       | >            | 64.00       | static      | -      | -      | -     | -     | - | -     | - | - |   |
|            | 2 | > | 32.00 | <b>0.19</b>  | >           | 32.00        | >            | 32.00       | >           | 32.00 | >     | 32.00       | <b>2.00</b>  | >           | 32.00        | >           | 32.00       | static | -      | -     | -     | - | -     | - | - |   |
| Hill-Def3  | 1 | > | 64.00 | >            | 64.00       | >            | 64.00        | >           | 64.00       | >     | 64.00 | >           | 64.00        | >           | 64.00        | >           | 64.00       | -      | -      | -     | -     | - | -     | - | - |   |
|            | 2 | > | 32.00 | >            | 32.00       | >            | 32.00        | >           | 3.00        | >     | 32.00 | >           | 32.00        | >           | 32.00        | >           | 32.00       | -      | -      | -     | -     | - | -     | - | - |   |
| Hill-Def4  | 1 | > | 64.00 | <b>0.50</b>  | >           | 64.00        | <b>32.00</b> | >           | 64.00       | >     | 64.00 | <b>1.00</b> | >            | 64.00       | >            | 64.00       | static      | -      | -      | -     | -     | - | -     | - | - |   |
|            | 2 | > | 32.00 | <b>0.70</b>  | >           | 32.00        | >            | 32.00       | >           | 32.00 | >     | 32.00       | <b>8.00</b>  | >           | 32.00        | >           | 32.00       | static | -      | -     | -     | - | -     | - | - |   |
| Hill-Def5  | 1 | > | 64.00 | >            | 64.00       | >            | 64.00        | >           | 64.00       | >     | 64.00 | >           | 64.00        | >           | 64.00        | >           | 64.00       | -      | -      | -     | -     | - | -     | - | - |   |
|            | 2 | > | 32.00 | >            | 32.00       | >            | 32.00        | >           | 32.00       | >     | 32.00 | >           | 32.00        | >           | 32.00        | >           | 32.00       | -      | -      | -     | -     | - | -     | - | - |   |
| Hill-Def6  | 1 | > | 64.00 | >            | 64.00       | >            | 64.00        | >           | 64.00       | >     | 64.00 | >           | 64.00        | >           | 64.00        | >           | 64.00       | -      | -      | -     | -     | - | -     | - | - |   |
|            | 2 | > | 32.00 | >            | 32.00       | >            | 32.00        | >           | 32.00       | >     | 32.00 | >           | 32.00        | >           | 32.00        | >           | 32.00       | -      | -      | -     | -     | - | -     | - | - |   |
| Hill-Def7  | 1 | > | 64.00 | >            | 64.00       | >            | 64.00        | >           | 64.00       | >     | 64.00 | >           | 64.00        | >           | 64.00        | >           | 64.00       | -      | -      | -     | -     | - | -     | - | - |   |
|            | 2 | > | 32.00 | >            | 32.00       | >            | 32.00        | >           | 32.00       | >     | 32.00 | >           | 32.00        | >           | 32.00        | >           | 32.00       | -      | -      | -     | -     | - | -     | - | - |   |
| Hill-Def8  | 1 | > | 64.00 | >            | 64.00       | >            | 64.00        | >           | 64.00       | >     | 64.00 | >           | 64.00        | >           | 64.00        | >           | 64.00       | -      | -      | -     | -     | - | -     | - | - |   |
|            | 2 | > | 32.00 | >            | 32.00       | >            | 32.00        | >           | 32.00       | >     | 32.00 | >           | 32.00        | >           | 32.00        | >           | 32.00       | -      | -      | -     | -     | - | -     | - | - |   |
| Hill-Def2b | 1 | > | 64.00 | <b>8.50</b>  | >           | 64.00        | >            | 64.00       | >           | 64.00 | >     | 64.00       | <b>64.00</b> | >           | 32.00        | >           | 32.00       | static | -      | -     | -     | - | -     | - | - |   |
|            | 2 | > | 32.00 | <b>13.45</b> | >           | 32.00        | >            | 32.00       | >           | 32.00 | >     | 32.00       | >            | 32.00       | >            | 64.00       | >           | 64.00  | static | -     | -     | - | -     | - | - |   |
| Hill-Lin1  | 1 | > | 64.00 | >            | 64.00       | >            | 64.00        | >           | 64.00       | >     | 64.00 | >           | 64.00        | >           | 64.00        | >           | 64.00       | -      | -      | -     | -     | - | -     | - | - |   |
|            | 1 | > | 64.00 | >            | 64.00       | >            | 64.00        | >           | 64.00       | >     | 64.00 | >           | 64.00        | >           | 64.00        | >           | 64.00       | -      | -      | -     | -     | - | -     | - | - |   |
| Hill-Lin2  | 2 | > | 32.00 | >            | 32.00       | >            | 32.00        | >           | 32.00       | >     | 32.00 | >           | 32.00        | >           | 32.00        | >           | 32.00       | -      | -      | -     | -     | - | -     | - | - |   |
|            | 2 | > | 32.00 | >            | 32.00       | >            | 32.00        | >           | 32.00       | >     | 32.00 | >           | 32.00        | >           | 32.00        | >           | 32.00       | -      | -      | -     | -     | - | -     | - | - |   |
| Hill-Cec1  | 1 | > | 64.00 | >            | 64.00       | <            | <b>0.25</b>  | <           | <b>0.25</b> | >     | 64.00 | >           | 64.00        | >           | 64.00        | <b>0.25</b> | <b>1.00</b> | -      | 1.00   | 4.00  | -     | - | -     | - | - |   |
|            | 2 | > | 32.00 | >            | 32.00       | <b>0.21</b>  | <b>0.20</b>  | >           | 32.00       | >     | 32.00 | >           | 32.00        | <b>0.50</b> | <b>0.50</b>  | -           | 0.50        | 0.50   | -      | 0.50  | 0.50  | - | -     | - | - |   |
| Hill-Cec2  | 1 | > | 64.00 | >            | 64.00       | <b>0.50</b>  | <b>0.93</b>  | >           | 64.00       | >     | 64.00 | >           | 64.00        | <b>1.00</b> | <b>4.00</b>  | -           | 1.00        | 16.00  | -      | 1.00  | 16.00 | - | -     | - | - |   |
|            | 2 | > | 32.00 | <b>4.36</b>  | <b>0.31</b> | <b>0.76</b>  | >            | 32.00       | >           | 32.00 | >     | 32.00       | <b>2.00</b>  | <b>2.00</b> | -            | 2.00        | 2.00        | -      | 2.00   | 2.00  | -     | - | -     | - | - |   |
| Hill-Cec3  | 1 | > | 64.00 | >            | 64.00       | <b>0.49</b>  | <b>0.40</b>  | >           | 64.00       | >     | 64.00 | >           | 64.00        | <b>1.00</b> | <b>4.00</b>  | -           | 1.00        | 16.00  | -      | 1.00  | 16.00 | - | -     | - | - |   |
|            | 2 | > | 32.00 | >            | 32.00       | <b>0.22</b>  | <b>0.79</b>  | >           | 32.00       | >     | 32.00 | >           | 32.00        | <b>0.50</b> | <b>2.00</b>  | -           | 32.00       | 2.00   | -      | 32.00 | 2.00  | - | -     | - | - |   |
| Hill-Cec4  | 1 |   | 37.37 | >            | 64.00       | <b>0.50</b>  | <            | <b>0.25</b> | >           | 64.00 | >     | 64.00       | >            | 64.00       | <b>1.00</b>  | <b>1.00</b> | -           | static | 16.00  | -     | -     | - | -     | - | - |   |
|            | 2 | > | 32.00 | >            | 32.00       | <b>0.32</b>  | <b>0.22</b>  | >           | 32.00       | >     | 32.00 | >           | 32.00        | <b>2.00</b> | <b>2.00</b>  | -           | 2.00        | 2.00   | -      | 2.00  | 2.00  | - | -     | - | - |   |
| Hill-Cec5  | 1 | > | 64.00 | >            | 64.00       | <b>0.50</b>  | <b>2.61</b>  | >           | 64.00       | >     | 64.00 | >           | 64.00        | <b>1.00</b> | <b>16.00</b> | -           | static      | static | -      | -     | -     | - | -     | - | - |   |

|            |   |   |              |   |              |   |             |   |              |   |       |   |       |   |       |             |              |   |       |        |      |       |
|------------|---|---|--------------|---|--------------|---|-------------|---|--------------|---|-------|---|-------|---|-------|-------------|--------------|---|-------|--------|------|-------|
|            | 2 | > | 32.00        | > | 32.00        |   | <b>0.23</b> |   | <b>3.60</b>  | > | 32.00 | > | 32.00 | > | 32.00 | <b>0.50</b> | <b>32.00</b> | - | 0.50  | 32.00  |      |       |
| Hill-Cec6  | 1 | > | 64.00        | > | 64.00        | > | 64.00       | > | 64.00        | > | 64.00 | > | 64.00 | > | 64.00 | >           | 32.00        | > | 32.00 | -      | 1.00 | 16.00 |
|            | 2 | > | 32.00        | > | 32.00        | > | 32.00       | > | 32.00        | > | 32.00 | > | 32.00 | > | 32.00 | >           | 64.00        | > | 64.00 | -      | 2.00 | 2.00  |
| Hill-Cec7  | 1 | > | 64.00        | > | 64.00        |   | <b>0.38</b> |   | <b>0.40</b>  | > | 64.00 | > | 64.00 | > | 64.00 | <b>1.00</b> | <b>4.00</b>  | - | -     | -      |      |       |
|            | 2 | > | 32.00        | > | 32.00        |   | <b>0.32</b> |   | <b>0.78</b>  | > | 32.00 | > | 32.00 | > | 32.00 | <b>2.00</b> | <b>2.00</b>  | - | -     | -      |      |       |
| Hill-Cec8  | 1 | > | 64.00        | > | 64.00        |   | <b>0.45</b> |   | <b>1.29</b>  | > | 64.00 | > | 64.00 | > | 64.00 | <b>1.00</b> | <b>4.00</b>  | - | 1.00  | 64.00  |      |       |
|            | 2 | > | 32.00        | > | 32.00        |   | <b>0.68</b> |   | <b>1.73</b>  | > | 32.00 | > | 32.00 | > | 32.00 | <b>2.00</b> | <b>8.00</b>  | - | 8.00  | 8.00   |      |       |
| Hill-Cec9  | 1 | > | 64.00        | > | 64.00        |   | <b>0.43</b> |   | <b>0.38</b>  | > | 64.00 | > | 64.00 | > | 64.00 | <b>1.00</b> | <b>1.00</b>  | - | 1.00  | static |      |       |
|            | 2 | > | 32.00        | > | 32.00        |   | <b>0.21</b> |   | <b>0.88</b>  | > | 32.00 | > | 32.00 | > | 32.00 | <b>0.50</b> | <b>2.00</b>  | - | 0.50  | 2.00   |      |       |
| Hill-Cec10 | 1 | > | 64.00        |   | 32.74        | < | <b>0.25</b> | < | <b>0.25</b>  | > | 64.00 | > | 64.00 | > | 64.00 | <b>0.25</b> | <b>1.00</b>  | - | 0.25  | 16.00  |      |       |
|            | 2 | > | 32.00        | > | 32.00        |   | <b>0.22</b> |   | <b>0.22</b>  | > | 32.00 | > | 32.00 | > | 32.00 | <b>0.50</b> | <b>2.00</b>  | - | 32.00 | 2.00   |      |       |
| Hill-Cec11 | 1 | > | 64.00        | > | 64.00        | < | <b>0.25</b> | < | <b>0.25</b>  | > | 64.00 | > | 64.00 | > | 64.00 | <b>1.00</b> | <b>1.00</b>  | - | 1.00  | 4.00   |      |       |
|            | 2 | > | 32.00        | > | 32.00        |   | <b>0.22</b> |   | <b>0.24</b>  | > | 32.00 | > | 32.00 | > | 32.00 | <b>0.50</b> | <b>2.00</b>  | - | 32.00 | 8.00   |      |       |
| Hill-Cec12 | 1 | > | 64.00        | > | 64.00        | < | <b>0.25</b> | < | <b>0.25</b>  | > | 64.00 | > | 64.00 | > | 64.00 | <b>0.25</b> | <b>1.00</b>  | - | 1.00  | static |      |       |
|            | 2 |   | 19.45        | > | 32.00        |   | <b>0.32</b> |   | <b>0.23</b>  | > | 32.00 | > | 32.00 | > | 32.00 | <b>2.00</b> | <b>2.00</b>  | - | 8.00  | 8.00   |      |       |
| Hill-Cec13 | 1 | > | 64.00        | > | 64.00        | < | <b>0.25</b> | < | <b>0.25</b>  | > | 64.00 | > | 64.00 | > | 64.00 | <b>1.00</b> | <b>1.00</b>  | - | 1.00  | 64.00  |      |       |
|            | 2 | > | 32.00        | > | 32.00        |   | <b>0.23</b> |   | <b>0.25</b>  | > | 32.00 | > | 32.00 | > | 32.00 | <b>0.50</b> | <b>2.00</b>  | - | 0.50  | 2.00   |      |       |
| Hill-Stom1 | 1 |   | <b>11.65</b> |   | <b>58.58</b> | > | 64.00       |   | <b>16.00</b> | > | 64.00 | > | 64.00 | > | 64.00 | >           | 32.00        | > | 32.00 | -      | 1.00 | 4.00  |
|            | 2 |   | <b>24.42</b> | > | 32.00        | > | 32.00       |   | <b>17.67</b> | > | 32.00 | > | 32.00 | > | 32.00 | >           | 64.00        | > | 64.00 | -      | 0.50 | 0.50  |
